# Supplementary material
Source: HighWire-hosted journal article supplement (https://erj.ersjournals.com/content/54/3/1900634)
Supplement: inline-supplementary-material-1 [file inline-supplementary-material-1.pdf]

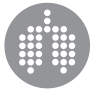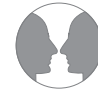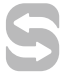

SHAREABLE PDF

# Misinterpretation of time-to-first event curves can lead to inappropriate treatment

Benjamin Hartley<sup>1</sup>, Gerard J. Criner<sup>2</sup>, Mark T. Dransfield<sup>3</sup>, David M.G. Halpin<sup>4</sup>, MeiLan K. Han<sup>5</sup>, C. Elaine Jones<sup>6</sup>, Sally Kilbride<sup>7</sup>, Peter Lange<sup>8,9</sup>, David A. Lipson <sup>10,11</sup>, David A. Lomas<sup>12</sup>, Neil Martin<sup>13,14</sup>, Fernando J. Martinez<sup>15</sup>, Dave Singh<sup>16</sup>, Robert A. Wise <sup>17</sup> and Sally Lettis<sup>7</sup>

**Affiliations:** <sup>1</sup>Statistics and Programming, Veramed Ltd, Twickenham, UK. <sup>2</sup>Lewis Katz School of Medicine at Temple University, Philadelphia, PA, USA. <sup>3</sup>Division of Pulmonary, Allergy, and Critical Care Medicine, Lung Health Center, University of Alabama at Birmingham, Birmingham, AL, USA. <sup>4</sup>Dept of Respiratory Medicine, Royal Devon and Exeter Hospital, Exeter, UK. <sup>5</sup>University of Michigan, Pulmonary and Critical Care, Ann Arbor, MI, USA. <sup>6</sup>GlaxoSmithKline, Research Triangle Park, NC, USA. <sup>7</sup>GlaxoSmithKline, Stockley Park West, Uxbridge, UK. <sup>8</sup>Dept of Public Health, Section of Epidemiology, University of Copenhagen, Copenhagen, Denmark. <sup>9</sup>Medical Dept, Herlev and Gentofte Hospital, Herlev, Denmark. <sup>10</sup>GlaxoSmithKline, Collegeville, PA, USA. <sup>11</sup>Perelman School of Medicine, University of Pennsylvania, Philadelphia, PA, USA. <sup>12</sup>UCL Respiratory, University College London, London, UK. <sup>13</sup>GlaxoSmithKline, Brentford, UK. <sup>14</sup>University of Leicester, Leicester, UK. <sup>15</sup>New York-Presbyterian Weill Cornell Medical Center, New York, NY, USA. <sup>16</sup>University of Manchester, Manchester, UK. <sup>17</sup>Division of Pulmonary and Critical Care Medicine, Johns Hopkins University School of Medicine, Baltimore, MD, USA.

**Correspondence:** Sally Lettis, GlaxoSmithKline, Stockley Park West, Uxbridge, Middlesex, UB11 1BT, UK. E-mail: sally.x.lettis@gsk.com

 @ERSpublications

**Evaluation of treatment effect durability over time cannot be based on analyses that examine the first of many events. Here, it is explained how misinterpretation of survival curves led to wrong conclusions in a recent *ERJ* editorial.** <http://bit.ly/2K3amgQ>

**Cite this article as:** Hartley B, Criner GJ, Dransfield MT, *et al*. Misinterpretation of time-to-first event curves can lead to inappropriate treatment. *Eur Respir J* 2019; 54: 1900634 [<https://doi.org/10.1183/13993003.00634-2019>].

This single-page version can be shared freely online.

*To the Editor:*

Great care should be taken when assessing the consistency of treatment effect over time based on a survival curve plot, and even more so when a treatment affects a repeating event end-point, such as exacerbations, rather than an event that can occur only once, like death.
